# Supplementary material for: Economic analysis of hydrogen production in Germany with a focus on green hydrogen, considering all three major water electrolysis technologies
Source: Royal Society of Chemistry journal article supplement (doi:10.1039/d3se00073g), 2023-01-01
Supplement: d3se00073g1.pdf [file d3se00073g1.pdf]

# Economic analysis of hydrogen production in Germany with a focus on green hydrogen, considering all three major water electrolysis technologies

14 pages, 0 figures, 11 tables

## Table of content

- S.1 Water electrolysis technologies
- S.2 Results of LCOH in absolute figures
- S.3 Results with/without electricity costs and changes
- S.4 Results of Sensitivity analysis
- S.5 References

## 5.1 Water electrolysis technologies

Water electrolysis is a well-known electrochemical reaction where  $H_2O$  is split into its original components  $H_2$  and  $O_2$  (see Eq. 1). This occurs at the cathode and anode, with hydrogen forming at the negatively charged cathode and oxygen at the positively charged anode. [1]. The most significant technologies for this process are AEL, PEM, and SOEC. These technologies differentiate regarding the charge carrier, amongst other things. In this regard, the charge carrier for AEL is  $OH^-$ , for PEM is  $H_3O^+/H^+$ , and for SOEC is  $O^{2-}$  [2].

Moreover, these technologies can help to mitigate climate change if renewable energy is considered for green hydrogen production. Then,  $CO_2$  emission can be reduced significantly if green hydrogen is used to replace fossil-based hydrogen. The reason is that more than 90% of the world's hydrogen is produced by steam reforming (grey hydrogen) and therefore natural gas, thus leading to tremendous  $CO_2$  emissions [3]. Consequently, grey hydrogen can be replaced sustainably by green hydrogen [4,5]. Besides that, the technologies have different advantages and disadvantages and differentiate regarding efficiency, lifetime, and technology readiness level, among other things. Table 1 shows an overview.

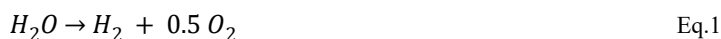

**Table 1: Overview of main characteristics [4-6]**

|                                    | AEL                                         | PEM                                                          | SOEC                                     |
|------------------------------------|---------------------------------------------|--------------------------------------------------------------|------------------------------------------|
| Electrolyte                        | NaOH, KOH                                   | Solid Polymer                                                | Yttria-stabilized zirconium oxide        |
| Electrodes                         | Ni                                          | Pt/C/IrO <sub>2</sub>                                        | Ni, ceramic                              |
| System lifetime (years)            | 20-30                                       | 20-30                                                        | 20                                       |
| Temperature °C                     | 60-80                                       | 50-80                                                        | 800-1000                                 |
| Pressure bar                       | 1-15                                        | 1-50                                                         | 1-5                                      |
| Efficiency %                       | 65-75                                       | 50-75                                                        | 80-90                                    |
| Cold start up (min)                | 15                                          | <15                                                          | <60                                      |
| Power density (W/cm <sup>2</sup> ) | Up to 1                                     | Up to 4.4                                                    | 65-70                                    |
| Stage of development               | Commercial                                  | Early commercialisation                                      | Early Development                        |
| Technology readiness level (TRL)   | 9                                           | 7-8                                                          | 5-7                                      |
| Advantages                         | Low material costs, large plant size        | Flexibility, faster cold start                               | High efficiency, usage of waste heat     |
| Disadvantages                      | Low current density, high maintenance costs | Use of noble materials, low electrolyte/electrode durability | Constant operation, short-term stability |

### 1.2.2 Alkaline electrolysis (AEL)

The AEL technology is commercially available since decades. This technology is available for large plant sizes and has a lifetime of approx. 20 to 30 years. The process operates at levels of between 60 and 80°C at 1-15 bar and has a process efficiency between 65-75%, while the cold start up time is approx. 15 min and the power density is up to 1 W/cm<sup>2</sup>. Besides that, sodium and potassium hydroxide are commonly used as an electrolyte. The use of non-noble materials and therefore relatively cheap material costs is the main advantage of the AEL technology, whereby corrosion –sodium and potassium hydroxide are commonly used as an electrolyte– and therefore high maintenance costs as well as a low current density are the main disadvantages of the technology [4-6].

### 1.2.3 Polymer electrolyte membrane (PEM)

The technology's first draft was designed in the 1950s by Grubb and further evolved in the 1960s by General Electric. The PEM technology is at an early commercialisation stage and has a system lifetime of 20-30 years, according to [26]. The process operates at temperatures between 50 to 80°C at 1-50 bar and has an efficiency of approx. 50-75%, while the cold start up time is below 15 min and the power density is up to 4.4 W/cm<sup>2</sup>. Compared to AEL, PEM has a higher flexibility and faster cold start and utilises a solid polymeric membrane instead of a liquid electrolyte and is thus not affected by corrosion. However, the technology uses noble materials, such as iridium, that leads to higher material costs and is therefore disadvantageous compared to the AEL technology. A replacement of iridium by a non-noble metal would considerably reduce the material costs and considered as a breakthrough [4-6].

### 1.2.4 Solid oxide electrolysis cell (SOEC)

The technology readiness level (TRL) of the SOEC technology is in between 5-7 and is therefore still on an early stage of development. The process operates at high temperature levels of 800–1000 °C at 1-5 bar and has a significantly higher

efficiency compared to AEL and PEM (80-90%), while the cold start up time and power density lie below 60 min and between 65-70 W/cm<sup>2</sup>, respectively. Besides that, yttria-stabilized zirconium oxide is used as an electrolyte. The process needs to be in constant operation. Otherwise, heat losses will occur and reduce the cell temperature considerably with the consequence of micro-cracks in the membrane. On the other side, material decomposition occurs due to high temperatures that leads to short-term stability. For a secure and stable operation in the future, these challenges need to be solved sustainably [4-6].

### 1.2.5 Blue and grey hydrogen

The terms blue and grey hydrogen refer to the production of hydrogen from fossil fuels, predominantly using natural gas. The difference between blue and grey hydrogen is that the CO<sub>2</sub> emissions released during the production of blue hydrogen are stored and thus not emitted into the atmosphere, whereas the CO<sub>2</sub> emissions during the production of grey hydrogen are released directly into the atmosphere. For this reason, blue hydrogen is more expensive to produce at about 2 €/kg H<sub>2</sub> than grey hydrogen (1.5 €/kg H<sub>2</sub>) [5]. The prices refer to natural gas prices from before the war.

More information with regard to the electrolysis technologies can be found here [2,4].

## S.2 Results of LCOH in absolute figures

**Table 2: Results of LCOH for 10 MW plants**

|         |      | 4000h | 4000h_RE | 6000h | 8000h |
|---------|------|-------|----------|-------|-------|
| current | AEL  | 14.43 | 5.00     | 13.62 | 13.30 |
|         | PEM  | 15.00 | 5.18     | 14.45 | 13.97 |
|         | SOEC | 13.66 | 5.96     | 12.56 | 11.97 |
| 2030    | AEL  | 5.84  | 3.72     | 5.38  | 5.18  |
|         | PEM  | 6.09  | 3.74     | 5.70  | 5.55  |
|         | SOEC | 4.97  | 3.27     | 4.49  | 4.26  |
| 2050    | AEL  | 5.54  | 2.92     | 5.32  | 5.19  |
|         | PEM  | 5.42  | 2.73     | 5.25  | 5.17  |
|         | SOEC | 4.47  | 2.39     | 4.24  | 4.11  |

**Table 3: Results of LCOH for 100 MW plants**

|         |      | 4000h | 4000h_RE | 6000h | 8000h |
|---------|------|-------|----------|-------|-------|
| current | AEL  | 13.88 | 4.44     | 13.24 | 12.98 |
|         | PEM  | 14.52 | 4.69     | 14.06 | 13.67 |
|         | SOEC | 12.33 | 4.63     | 11.59 | 11.19 |
| 2030    | AEL  | 5.45  | 3.33     | 5.11  | 4.97  |
|         | PEM  | 5.73  | 3.38     | 5.46  | 5.35  |
|         | SOEC | 4.38  | 2.68     | 4.09  | 3.94  |
| 2050    | AEL  | 5.27  | 2.65     | 5.13  | 5.05  |
|         | PEM  | 5.31  | 2.62     | 5.17  | 5.11  |
|         | SOEC | 4.12  | 2.04     | 4.00  | 3.93  |

### S.3 Results with/without electricity costs and changes

**Table 4: Results with/without electricity costs for 10 MW plants**

|         |      | 4000h | 4000h_0_€/M<br>Wh | 4000h_RE | 4000h_RE_0_€/MWh | 6000h | 6000h_0_€/M<br>Wh | 8000h | 8000h_0_€/M<br>Wh |
|---------|------|-------|-------------------|----------|------------------|-------|-------------------|-------|-------------------|
| current | AEL  | 14.43 | 2.41              | 5.00     | 2.41             | 13.62 | 1.60              | 13.30 | 1.27              |
|         | PEM  | 15.00 | 2.48              | 5.18     | 2.48             | 14.45 | 1.93              | 13.97 | 1.45              |
|         | SOEC | 13.66 | 3.84              | 5.96     | 3.84             | 12.56 | 2.74              | 11.97 | 2.15              |
| 2030    | AEL  | 5.84  | 1.25              | 3.72     | 1.25             | 5.38  | 0.80              | 5.18  | 0.60              |
|         | PEM  | 6.09  | 1.00              | 3.74     | 1.00             | 5.70  | 0.62              | 5.55  | 0.47              |
|         | SOEC | 4.97  | 1.29              | 3.27     | 1.29             | 4.49  | 0.82              | 4.26  | 0.58              |
| 2050    | AEL  | 5.54  | 0.53              | 2.92     | 0.53             | 5.32  | 0.31              | 5.19  | 0.18              |
|         | PEM  | 5.42  | 0.28              | 2.73     | 0.28             | 5.25  | 0.11              | 5.17  | 0.03              |
|         | SOEC | 4.47  | 0.50              | 2.39     | 0.50             | 4.24  | 0.26              | 4.11  | 0.14              |

**Table 5: Results with/without electricity costs for 100 MW plants**

|         |      | 4000h | 4000h_0_€/MWh | 4000h_RE | 4000h_RE_0_€/MWh | 6000h | 6000h_0_€/MWh | 8000h | 8000h_0_€/MWh |
|---------|------|-------|---------------|----------|------------------|-------|---------------|-------|---------------|
| current | AEL  | 13.88 | 1.85          | 4.44     | 1.85             | 13.24 | 1.21          | 12.98 | 0.95          |
|         | PEM  | 14.52 | 2.00          | 4.69     | 2.00             | 14.06 | 1.54          | 13.67 | 1.15          |
|         | SOEC | 12.33 | 2.51          | 4.63     | 2.51             | 11.59 | 1.77          | 11.19 | 1.37          |
| 2030    | AEL  | 5.45  | 0.87          | 3.33     | 0.87             | 5.11  | 0.53          | 4.97  | 0.38          |
|         | PEM  | 5.73  | 0.65          | 3.38     | 0.65             | 5.46  | 0.38          | 5.35  | 0.27          |
|         | SOEC | 4.38  | 0.71          | 2.68     | 0.71             | 4.09  | 0.41          | 3.94  | 0.27          |
| 2050    | AEL  | 5.27  | 0.27          | 2.65     | 0.27             | 5.13  | 0.12          | 5.05  | 0.04          |
|         | PEM  | 5.31  | 0.17          | 2.62     | 0.17             | 5.17  | 0.03          | 5.11  | -0.03         |
|         | SOEC | 4.12  | 0.15          | 2.04     | 0.15             | 4.00  | 0.02          | 3.93  | -0.04         |

**Table 6: Changes when electricity price is 0 € (10 MW)**

|         |      | 4000h | 4000h_RE | 6000h | 8000h |
|---------|------|-------|----------|-------|-------|
| current | AEL  | 83.3% | 51.8%    | 88.3% | 90.5% |
|         | PEM  | 83.5% | 52.1%    | 86.7% | 89.6% |
|         | SOEC | 71.9% | 35.5%    | 78.2% | 82.1% |
| 2030    | AEL  | 78.5% | 66.3%    | 85.2% | 88.4% |
|         | PEM  | 83.5% | 73.1%    | 89.1% | 91.6% |
|         | SOEC | 74.0% | 60.4%    | 81.8% | 86.4% |
| 2050    | AEL  | 90.4% | 81.7%    | 94.2% | 96.4% |
|         | PEM  | 94.8% | 89.8%    | 98.0% | 99.4% |
|         | SOEC | 88.8% | 79.1%    | 93.8% | 96.6% |



**Table 7: Changes when electricity price is 0 € (100 MW)**

|         |      | 4000h | 4000h_RE | 6000h | 8000h |
|---------|------|-------|----------|-------|-------|
| current | AEL  | 86.7% | 58.3%    | 90.9% | 92.7% |
|         | PEM  | 86.3% | 57.5%    | 89.0% | 91.6% |
|         | SOEC | 79.6% | 45.7%    | 84.8% | 87.8% |
| 2030    | AEL  | 84.1% | 74.0%    | 89.7% | 92.3% |
|         | PEM  | 88.7% | 80.8%    | 93.1% | 95.0% |
|         | SOEC | 83.9% | 73.7%    | 89.9% | 93.3% |
| 2050    | AEL  | 95.0% | 90.0%    | 97.7% | 99.3% |
|         | PEM  | 96.8% | 93.6%    | 99.4% | n/a   |
|         | SOEC | 96.4% | 92.8%    | 99.5% | n/a   |

## S.4 Results of Sensitivity analysis

**Table 8: Sensitivity analysis: CAPEX 10 and 100 MW**

| CAPEX_10 MW  |         |     |      |      |     |      |      |     |      |
|--------------|---------|-----|------|------|-----|------|------|-----|------|
| +20%         | Current |     |      | 2030 |     |      | 2050 |     |      |
| Current      | AEL     | PEM | SOEC | AEL  | PEM | SOEC | AEL  | PEM | SOEC |
| 4000h        | 3%      | 3%  | 4%   | 4%   | 3%  | 5%   | 2%   | 2%  | 3%   |
| 4000_RE      | 8%      | 8%  | 10%  | 6%   | 5%  | 7%   | 3%   | 2%  | 3%   |
| 6000h        | 2%      | 2%  | 3%   | 3%   | 2%  | 4%   | 2%   | 1%  | 2%   |
| 8000h        | 1%      | 1%  | 2%   | 2%   | 2%  | 3%   | 1%   | 1%  | 2%   |
| CAPEX        |         |     |      |      |     |      |      |     |      |
| -20%         | Current |     |      | 2030 |     |      | 2050 |     |      |
| Current      | AEL     | PEM | SOEC | AEL  | PEM | SOEC | AEL  | PEM | SOEC |
| 4000h        | -3%     | -3% | -4%  | -4%  | -3% | -5%  | -2%  | -2% | -3%  |
| 4000_RE      | -8%     | -8% | -10% | -6%  | -5% | -7%  | -3%  | -2% | -3%  |
| 6000h        | -2%     | -2% | -3%  | -3%  | -2% | -4%  | -2%  | -1% | -2%  |
| 8000h        | -1%     | -1% | -2%  | -2%  | -2% | -3%  | -1%  | -1% | -2%  |
| CAPEX_100 MW |         |     |      |      |     |      |      |     |      |
| +20%         | Current |     |      | 2030 |     |      | 2050 |     |      |
| 2030         | AEL     | PEM | SOEC | AEL  | PEM | SOEC | AEL  | PEM | SOEC |
| 4000h        | 2%      | 2%  | 3%   | 3%   | 2%  | 3%   | 2%   | 1%  | 2%   |
| 4000_RE      | 7%      | 7%  | 8%   | 5%   | 4%  | 6%   | 3%   | 3%  | 3%   |
| 6000h        | 2%      | 2%  | 2%   | 2%   | 2%  | 2%   | 1%   | 1%  | 1%   |
| 8000h        | 1%      | 1%  | 2%   | 2%   | 1%  | 2%   | 1%   | 1%  | 1%   |
| CAPEX        |         |     |      |      |     |      |      |     |      |
| -20%         | Current |     |      | 2030 |     |      | 2050 |     |      |
| 2030         | AEL     | PEM | SOEC | AEL  | PEM | SOEC | AEL  | PEM | SOEC |
| 4000h        | -2%     | -2% | -3%  | -3%  | -2% | -3%  | -2%  | -1% | -2%  |
| 4000_RE      | -7%     | -7% | -8%  | -5%  | -4% | -6%  | -3%  | -3% | -3%  |
| 6000h        | -2%     | -2% | -2%  | -2%  | -2% | -2%  | -1%  | -1% | -1%  |
| 8000h        | -1%     | -1% | -2%  | -2%  | -1% | -2%  | -1%  | -1% | -1%  |

**Table 9: Sensitivity analysis: Discount rate 10 and 100 MW**

|         | Discount rate_10 MW  |     |      |      |     |      |      |     |      |
|---------|----------------------|-----|------|------|-----|------|------|-----|------|
| +20%    | Current              |     |      | 2030 |     |      | 2050 |     |      |
| Current | AEL                  | PEM | SOEC | AEL  | PEM | SOEC | AEL  | PEM | SOEC |
| 4000h   | 2%                   | 2%  | 3%   | 3%   | 2%  | 3%   | 2%   | 1%  | 2%   |
| 4000_RE | 5%                   | 5%  | 7%   | 4%   | 3%  | 5%   | 5%   | 5%  | 5%   |
| 6000h   | 1%                   | 1%  | 2%   | 2%   | 1%  | 2%   | 1%   | 1%  | 1%   |
| 8000h   | 1%                   | 1%  | 2%   | 1%   | 1%  | 2%   | 1%   | 1%  | 1%   |
|         | Discount rate        |     |      |      |     |      |      |     |      |
| -20%    | Current              |     |      | 2030 |     |      | 2050 |     |      |
| Current | AEL                  | PEM | SOEC | AEL  | PEM | SOEC | AEL  | PEM | SOEC |
| 4000h   | -2%                  | -2% | -3%  | -2%  | -2% | -3%  | -2%  | -1% | -2%  |
| 4000_RE | -5%                  | -5% | -6%  | -4%  | -3% | -5%  | -5%  | -5% | -4%  |
| 6000h   | -1%                  | -1% | -2%  | -2%  | -1% | -2%  | -1%  | -1% | -1%  |
| 8000h   | -1%                  | -1% | -2%  | -1%  | -1% | -2%  | -1%  | -1% | -1%  |
|         | Discount rate_100 MW |     |      |      |     |      |      |     |      |
| +20%    | Current              |     |      | 2030 |     |      | 2050 |     |      |
| 2030    | AEL                  | PEM | SOEC | AEL  | PEM | SOEC | AEL  | PEM | SOEC |
| 4000h   | 1%                   | 1%  | 2%   | 1%   | 1%  | 1%   | 1%   | 1%  | 1%   |
| 4000_RE | 5%                   | 4%  | 6%   | 4%   | 4%  | 4%   | 2%   | 2%  | 2%   |
| 6000h   | 1%                   | 1%  | 2%   | 1%   | 1%  | 1%   | 1%   | 1%  | 1%   |
| 8000h   | 1%                   | 1%  | 1%   | 1%   | 1%  | 1%   | 1%   | 0%  | 1%   |
|         | Discount rate        |     |      |      |     |      |      |     |      |
| -20%    | Current              |     |      | 2030 |     |      | 2050 |     |      |
| 2030    | AEL                  | PEM | SOEC | AEL  | PEM | SOEC | AEL  | PEM | SOEC |
| 4000h   | -1%                  | -1% | -2%  | -1%  | -1% | -1%  | -1%  | -1% | -1%  |
| 4000_RE | -4%                  | -4% | -6%  | -4%  | -4% | -4%  | -2%  | -2% | -2%  |
| 6000h   | -1%                  | -1% | -1%  | -1%  | -1% | -1%  | -1%  | -1% | -1%  |
| 8000h   | -1%                  | -1% | -1%  | -1%  | -1% | -1%  | -1%  | 0%  | -1%  |

**Table 10: Sensitivity analysis: Electricity price 10 and 100 MW**

|         | Electricity_10 MW  |      |      |      |      |      |      |      |      |
|---------|--------------------|------|------|------|------|------|------|------|------|
| +20%    | Current            |      |      | 2030 |      |      | 2050 |      |      |
| Current | AEL                | PEM  | SOEC | AEL  | PEM  | SOEC | AEL  | PEM  | SOEC |
| 4000h   | 17%                | 17%  | 14%  | 16%  | 17%  | 15%  | 18%  | 19%  | 18%  |
| 4000_RE | 10%                | 10%  | 7%   | 13%  | 15%  | 12%  | 19%  | 20%  | 19%  |
| 6000h   | 18%                | 17%  | 16%  | 17%  | 18%  | 16%  | 19%  | 20%  | 19%  |
| 8000h   | 18%                | 18%  | 16%  | 18%  | 18%  | 17%  | 19%  | 20%  | 19%  |
|         | Electricity        |      |      |      |      |      |      |      |      |
| -20%    | Current            |      |      | 2030 |      |      | 2050 |      |      |
| Current | AEL                | PEM  | SOEC | AEL  | PEM  | SOEC | AEL  | PEM  | SOEC |
| 4000h   | -17%               | -17% | -14% | -16% | -17% | -15% | -18% | -19% | -18% |
| 4000_RE | -10%               | -10% | -7%  | -13% | -15% | -12% | -19% | -20% | -19% |
| 6000h   | -18%               | -17% | -16% | -17% | -18% | -16% | -19% | -20% | -19% |
| 8000h   | -18%               | -18% | -16% | -18% | -18% | -17% | -19% | -20% | -19% |
|         | Electricity_100 MW |      |      |      |      |      |      |      |      |
| +20%    | Current            |      |      | 2030 |      |      | 2050 |      |      |
| 2030    | AEL                | PEM  | SOEC | AEL  | PEM  | SOEC | AEL  | PEM  | SOEC |
| 4000h   | 17%                | 17%  | 16%  | 17%  | 18%  | 17%  | 19%  | 19%  | 19%  |
| 4000_RE | 12%                | 11%  | 9%   | 15%  | 16%  | 15%  | 18%  | 19%  | 19%  |
| 6000h   | 18%                | 18%  | 17%  | 18%  | 19%  | 18%  | 20%  | 20%  | 20%  |
| 8000h   | 19%                | 18%  | 18%  | 18%  | 19%  | 19%  | 20%  | 20%  | 20%  |
|         | Electricity        |      |      |      |      |      |      |      |      |
| -20%    | Current            |      |      | 2030 |      |      | 2050 |      |      |
| 2030    | AEL                | PEM  | SOEC | AEL  | PEM  | SOEC | AEL  | PEM  | SOEC |
| 4000h   | -17%               | -17% | -16% | -17% | -18% | -17% | -19% | -19% | -19% |
| 4000_RE | -12%               | -11% | -9%  | -15% | -16% | -15% | -18% | -19% | -19% |
| 6000h   | -18%               | -18% | -17% | -18% | -19% | -18% | -20% | -20% | -20% |
| 8000h   | -19%               | -18% | -18% | -18% | -19% | -19% | -20% | -20% | -20% |

**Table 11: Sensitivity analysis: Efficiency 10 and 100 MW**

| Efficiency_10 MW  |         |      |      |      |      |      |      |      |      |
|-------------------|---------|------|------|------|------|------|------|------|------|
| +20%              | Current |      |      | 2030 |      |      | 2050 |      |      |
| Current           | AEL     | PEM  | SOEC | AEL  | PEM  | SOEC | AEL  | PEM  | SOEC |
| 4000h             | -17%    | -17% | -17% | -17% | -17% | -17% | -17% | -17% | -17% |
| 4000_RE           | -17%    | -17% | -17% | -17% | -17% | -17% | -17% | -17% | -17% |
| 6000h             | -17%    | -17% | -17% | -17% | -17% | -17% | -17% | -17% | -17% |
| 8000h             | -17%    | -17% | -17% | -17% | -17% | -17% | -17% | -17% | -17% |
| Efficiency        |         |      |      |      |      |      |      |      |      |
| -20%              | Current |      |      | 2030 |      |      | 2050 |      |      |
| Current           | AEL     | PEM  | SOEC | AEL  | PEM  | SOEC | AEL  | PEM  | SOEC |
| 4000h             | 25%     | 25%  | 25%  | 25%  | 25%  | 25%  | 25%  | 25%  | 25%  |
| 4000_RE           | 25%     | 25%  | 25%  | 25%  | 25%  | 25%  | 25%  | 25%  | 25%  |
| 6000h             | 25%     | 25%  | 25%  | 25%  | 25%  | 25%  | 25%  | 25%  | 25%  |
| 8000h             | 25%     | 25%  | 25%  | 25%  | 25%  | 25%  | 25%  | 25%  | 25%  |
| Efficiency_100 MW |         |      |      |      |      |      |      |      |      |
| +20%              | Current |      |      | 2030 |      |      | 2050 |      |      |
| 2030              | AEL     | PEM  | SOEC | AEL  | PEM  | SOEC | AEL  | PEM  | SOEC |
| 4000h             | -17%    | -17% | -17% | -17% | -17% | -17% | -17% | -17% | -17% |
| 4000_RE           | -17%    | -17% | -17% | -17% | -17% | -17% | -17% | -17% | -17% |
| 6000h             | -17%    | -17% | -17% | -17% | -17% | -17% | -17% | -17% | -17% |
| 8000h             | -17%    | -17% | -17% | -17% | -17% | -17% | -17% | -17% | -17% |
| Efficiency        |         |      |      |      |      |      |      |      |      |
| -20%              | Current |      |      | 2030 |      |      | 2050 |      |      |
| 2030              | AEL     | PEM  | SOEC | AEL  | PEM  | SOEC | AEL  | PEM  | SOEC |
| 4000h             | 25%     | 25%  | 25%  | 25%  | 25%  | 25%  | 25%  | 25%  | 25%  |
| 4000_RE           | 25%     | 25%  | 25%  | 25%  | 25%  | 25%  | 25%  | 25%  | 25%  |
| 6000h             | 25%     | 25%  | 25%  | 25%  | 25%  | 25%  | 25%  | 25%  | 25%  |
| 8000h             | 25%     | 25%  | 25%  | 25%  | 25%  | 25%  | 25%  | 25%  | 25%  |

## S.5 References

- [1] Kumar Shiva, S., Himabindu, V. Hydrogen production by PEM water electrolysis – A review. *Mat. Sci. Energy Technol.* 2019, 2, 442–454. <https://doi.org/10.1016/j.mset.2019.03.002>.
- [2] Götz, M.; Lefebvre, J.; Mörs, F.; McDaniel Koch, A.; Graf, F.; Bajohr, S.; Reimert, R.; Kolb, T. Renewable Power-to-Gas: A technological and economic review. *Renew. Energ.* 2016, 85, 1371–1390. [DOI 10.1016/j.renene.2015.07.066](https://doi.org/10.1016/j.renene.2015.07.066)
- [3] Rapier, R. *Estimating the Carbon Footprint of Hydrogen*. <https://www.forbes.com/sites/mitsubishiheavyindustries/2022/01/26/the-stark-difference-between-global-warming-of-15c-and-20c/?sh=3f7ba7f02a48> (accessed Dec 11, 2022).
- [4] Dahiru, A.R., Vuokila, A., Huuhtanen, M. Recent development in Power-to-X: Part I – A review on techno-economic analysis. *J. Energy Storage*. 2022, 56, 105861 [DOI.10.1016/j.est.2022.105861](https://doi.org/10.1016/j.est.2022.105861)
- [5] Horng, P., Kalis, M. *Wasserstoff - Farbenlehre. Rechtswissenschaftliche und rechtspolitische Kurzstudie*. Institut für Klimaschutz, Energie und Mobilität e.V. (IKEM) (Ed.), 2020. [https://www.ikem.de/wp-content/uploads/2021/01/IKEM\\_Kurzstudie\\_Wasserstoff\\_Farbenlehre.pdf](https://www.ikem.de/wp-content/uploads/2021/01/IKEM_Kurzstudie_Wasserstoff_Farbenlehre.pdf) (accessed Dec 18, 2022).
- [6] Schmidt, O., Gambhir, A., Staffell, I., Hawkes, A., Nelson, J., Few, S. Future cost and performance of water electrolysis: An expert elicitation study. *Int. J. Hydrog. Energy* 2017, 42, 30470–30492. [DOI.10.1016/j.ijhydene.2017.10.045](https://doi.org/10.1016/j.ijhydene.2017.10.045)
- [7] Patonia, A., Poudineh, R. Cost-competitive green hydrogen: how to lower the cost of electrolyzers? *Oxford Institute for Energy Studies*. Jan 2022. ISBN 978-1-78467-193-8.
